# Supplementary material for: Cytosolic ROS production by NADPH oxidase 2 regulates muscle glucose uptake during exercise
Source: PubMed Central journal article supplement (PMC6789013; doi:10.1038/s41467-019-12523-9), 2019-10-11
Supplement: 41467_2019_12523_MOESM1_ESM.pdf [file 41467_2019_12523_MOESM1_ESM.pdf]

**Cytosolic ROS production by NADPH oxidase 2 regulates muscle glucose uptake during exercise**

Carlos Henríquez-Olguin *et al.*

**Supplementary Information**

**Supplementary Table 1. Antibodies used in the study.**

| <b>Antibody</b>                               | <b>Supplier</b>                         | <b>Catalog #</b> | <b>Dilution</b>                                                          |
|-----------------------------------------------|-----------------------------------------|------------------|--------------------------------------------------------------------------|
| p-AMPK Thr172                                 | Cell Signaling Technology               | #2535S           | 1:1000                                                                   |
| p-p38 MAPK<br>Thr180/Tyr182                   | Cell Signaling Technology               | #9211            | 1:1000                                                                   |
| Hexokinase II                                 | Cell Signaling Technology               | #2867            | 1:1000                                                                   |
| GLUT4                                         | Invitrogen                              | #PA5-23052       | 1:1000                                                                   |
| p-ACC2 Ser 212                                | Millipore                               | #03-303          | 1:1000                                                                   |
| Rac1                                          | BD Biosciences                          | #610650          | 1:1000                                                                   |
| NOX2                                          | Abcam                                   | #Ab129068        | 1:1000                                                                   |
| Catalase                                      | Santa Cruz Biotechnology                | sc-271803        | 1:750                                                                    |
| MnSOD                                         | Millipore                               | #06-984          | 1:1000                                                                   |
| TRX2                                          | Santa Cruz Biotechnology                | #sc-50336        | 1:1000                                                                   |
| Actin                                         | Cell Signaling Technology               | #4973            | 1:3000                                                                   |
| Total p38 MAPK                                | Cell Signaling Technology               | #9212            | 1:1000                                                                   |
| Alpha2 AMPK                                   | D. Grahame Hardie, University of Dundee |                  | 1:1000                                                                   |
| p-Erk1/2-Thr202/Tyr204                        | Cell Signaling Technology               | #9101            | 1:1000                                                                   |
| Total ERK 1/2                                 | Cell Signaling Technology               | #9102            | 1:1000                                                                   |
| p-TBC1D1 Ser231                               | Millipore                               | #07-2268         | 1:1000                                                                   |
| OXPPOS cocktail                               | Abcam                                   | #ab110413        | 1:5000                                                                   |
| Goat-anti-mouse IgG2b<br>Alexa 647 conjugated | Life Technologies                       | A-21242          | 1:100                                                                    |
| Goat-anti-mouse IgM, Alexa<br>555 conjugated  | Life Technologies                       | A-21426          | 1:500                                                                    |
| Goat-anti-mouse IgG1 Alexa<br>488 conjugated  | Life Technologies                       | A-21121          | 1:400                                                                    |
| Myosin Heavy Chain Type I                     | DSHB, University of Iowa                | BA-D5            | 1:100                                                                    |
| Myosin Heavy Chain Type<br>IIA                | DSHB, University of Iowa                | SC-71            | 1:100                                                                    |
| Myosin Heavy Chain Type<br>IIB                | DSHB, University of Iowa                | BF-F3            | 1:100                                                                    |
| PECAM1                                        | Santa Cruz Biotechnology                | M-20             | 1:100                                                                    |
| <i>Myc</i>                                    | Cell Signaling Technology               | #2278            | 1:400                                                                    |
| Cu-Zn-SOD                                     |                                         |                  |                                                                          |
| Alexa 568 secondary<br>antibody               | Life Technologies                       | A10042           | 1:400<br>diluted<br>blocking<br>buffer<br>containing<br>0.04%<br>saponin |

**Supplementary Table 2. Human subjects' characteristics.**

|                                   | <b>Mean</b> | <b>SD</b> |
|-----------------------------------|-------------|-----------|
| Age (y)                           | 29.0        | 3.56      |
| Weight (kg)                       | 76.8        | 7.03      |
| Height (cm)                       | 1.76        | 0.07      |
| BMI (m/kg <sup>2</sup> )          | 24.9        | 1.45      |
| Peak Power Output (W)             | 300         | 67.17     |
| Relative Peak Power Output (W/kg) | 3.9         | 0.51      |

## Supplementary Figures

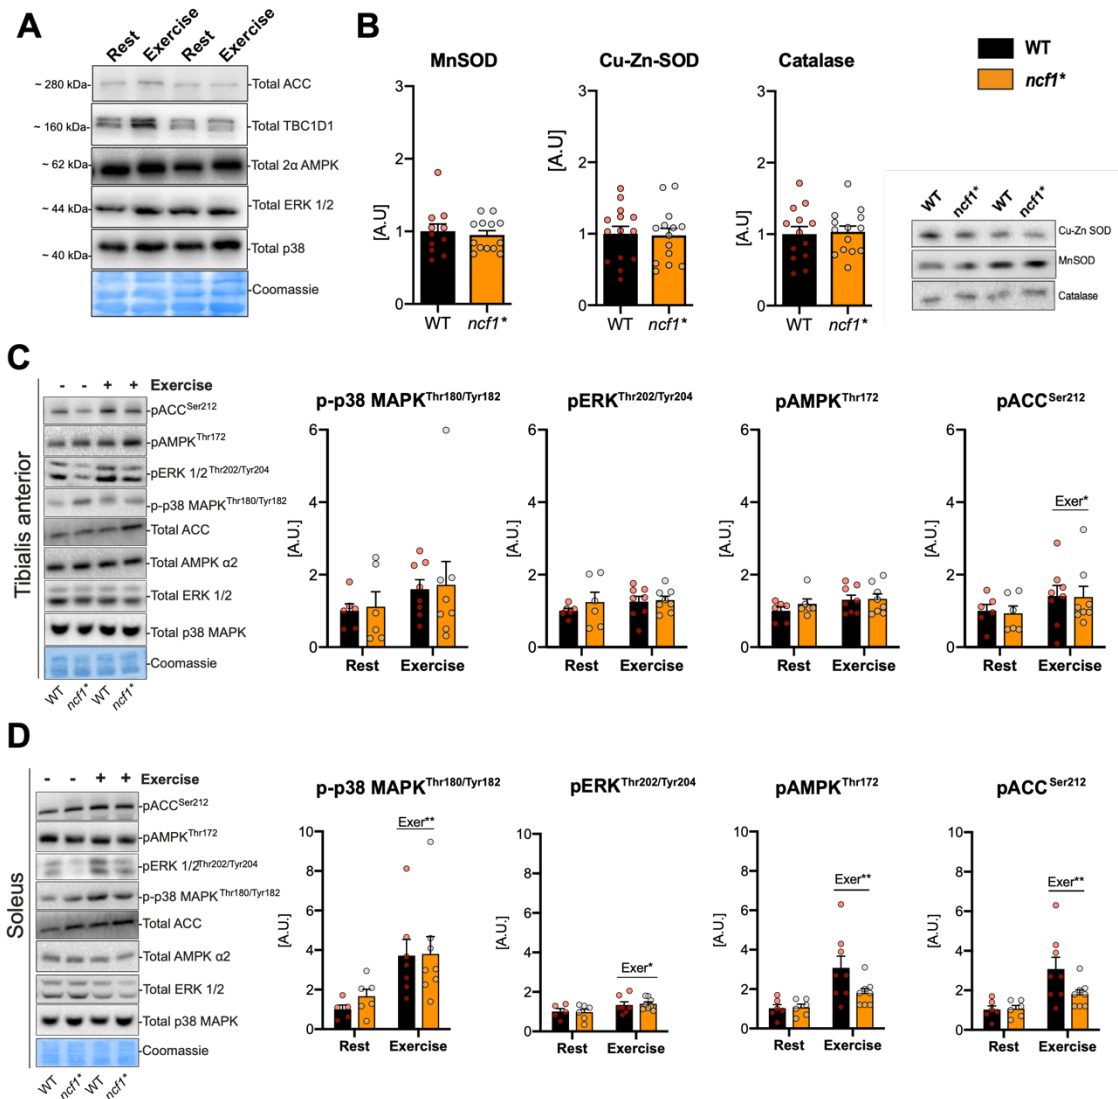

**Supplementary Figure 1. Similar abundance of antioxidant enzymes in *ncf1\** muscles.** **a** Total proteins levels of p38 MAPK, ERK 1/2, alpha2 AMPK, ACC, TBC1D1 and Coomassie staining as loading control in human muscle lysates (n=3). **b** Antioxidant proteins from tibialis anterior muscle lysates from both *ncf1\** and WT mice (n=13-14). **c**, **d** Exercise-induced cellular signaling in soleus and tibialis anterior muscles. In **b**, a t-test was performed for statistical analysis. For **c**, **d** two-way ANOVA was performed to test for effects of exercise (Exer) genotype (Geno), and interaction (Int), followed by Tukey's

*post hoc* test with correction for multiple comparisons. \*, \*\* denotes  $p < 0.05$  and  $p < 0.01$ , respectively for main effects. Individual values and mean  $\pm$  SEM are shown.

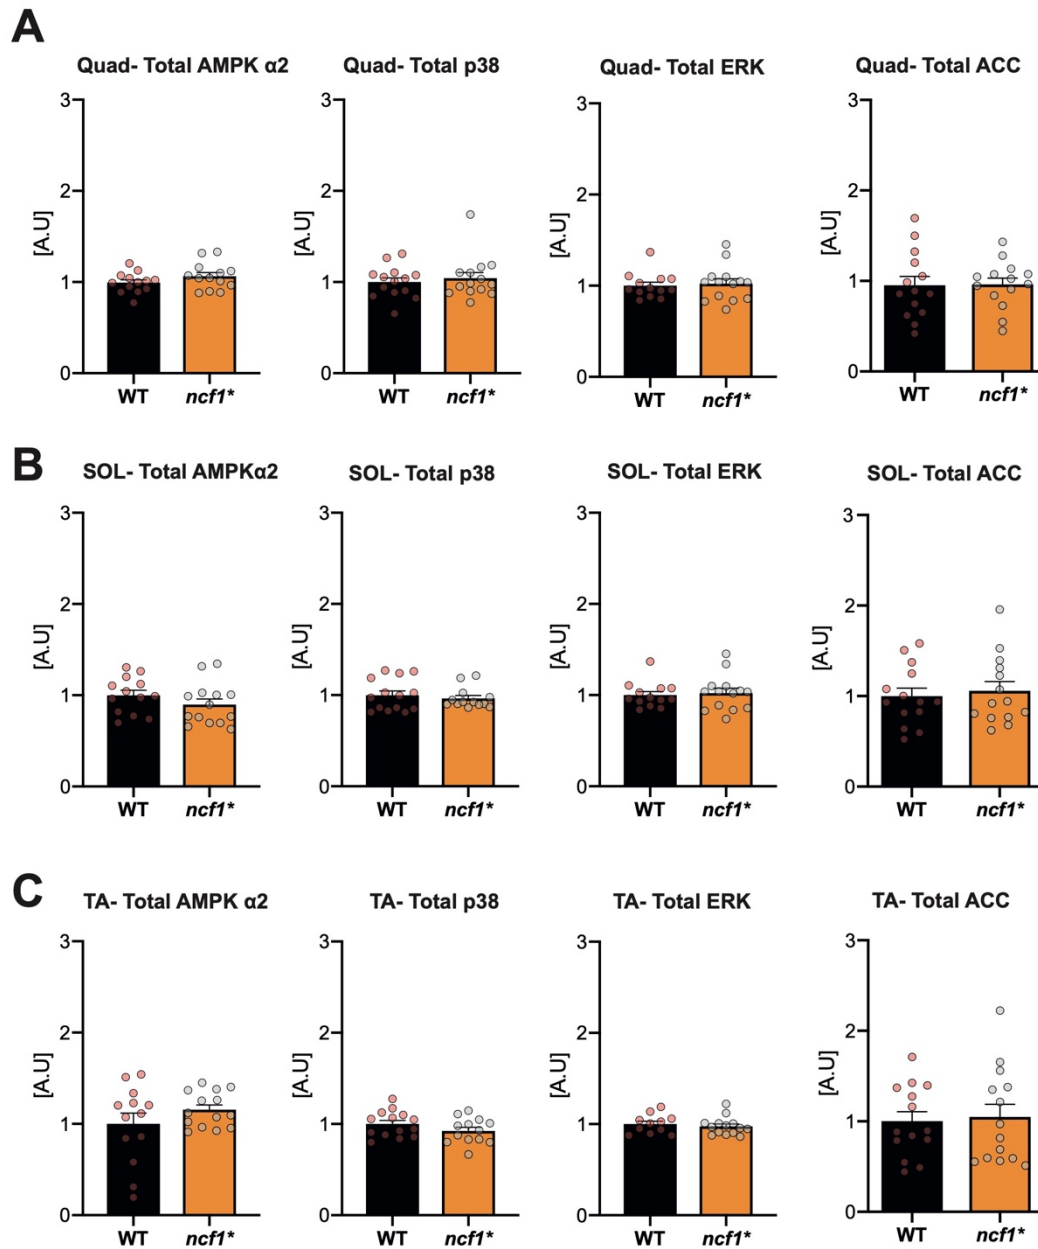

**Supplementary Figure 2.** Total protein levels of exercise-responsive kinases are similar in WT and *ncf1*\* muscles. Protein levels of p38 MAPK, ERK 1/2, alpha2 AMPK, and ACC in **a** quadriceps **b** soleus (SOL) and **c** tibialis anterior (TA) from WT and *ncf1*\* mice (n=14 per group). For **a**, **b**, and **c** t-test were performed for statistical analysis. Individual values and mean  $\pm$  SEM are shown.

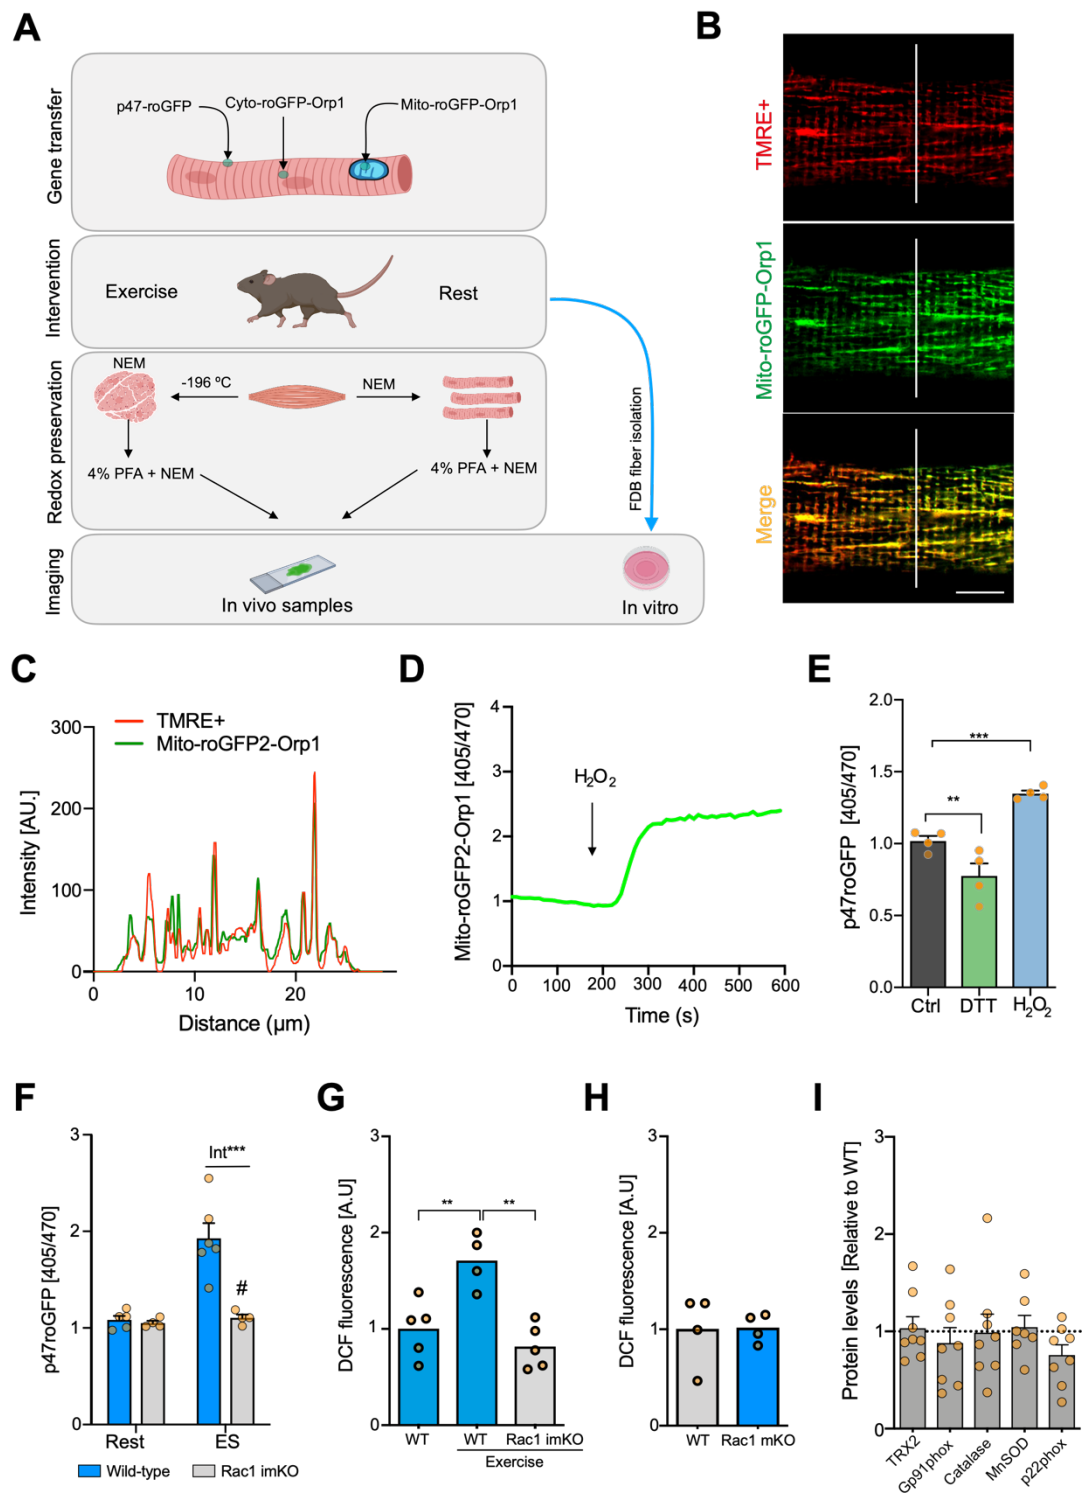

**Supplementary Figure 3.** Genetically-encoded biosensors are able to measure subcellular redox changes in muscle fibers. **a** Graphical description of the work flow for genetically encoded redox biosensors (the procedures are described in the methods section) **b** Representative image and **c** line-profile of the Mito-roGFP2-Orp1 and TMRE<sup>+</sup>

fluorescence in live flexor digitorum brevis (FDB) fibers (n=3). **d** Mito-roGFP2-Orp1 oxidation by H<sub>2</sub>O<sub>2</sub> (0.5 mM) stimulation in live FDB fibers (n=3). **e** p47roGFP oxidation/reduction in response to H<sub>2</sub>O<sub>2</sub> (0.5 mM) and DTT (0.5 mM) (n=4). **f** p47roGFP oxidation induced by electrical stimulation in FDB Rac1 imKO fibers (n=5). **g** DCFH oxidation after 20 min of exercise in WT and Rac1 imKO Tibialis Anterior muscle (n=5-4). **h** DCFH oxidation under resting conditions in WT and Rac1 imKO tibialis anterior muscle. **i** Redox-regulated proteins in FDB fibers are similar between WT and Rac1 deficient muscles (n=4-5). One- way (for E, G, I) and two-way ANOVA (for **f**) were performed to test for effects of exercise (Exer), genotype (Geno), and interaction (Int), followed by Tukey's *post hoc* test with correction for multiple comparisons. Individual values and mean ± SEM are shown. # denotes  $p < 0.05$  compared to the WT group. \*\*, \*\*\* denotes  $p < 0.01$  and  $p < 0.001$  respectively for main effect. For **b** scale bar= 10 um.



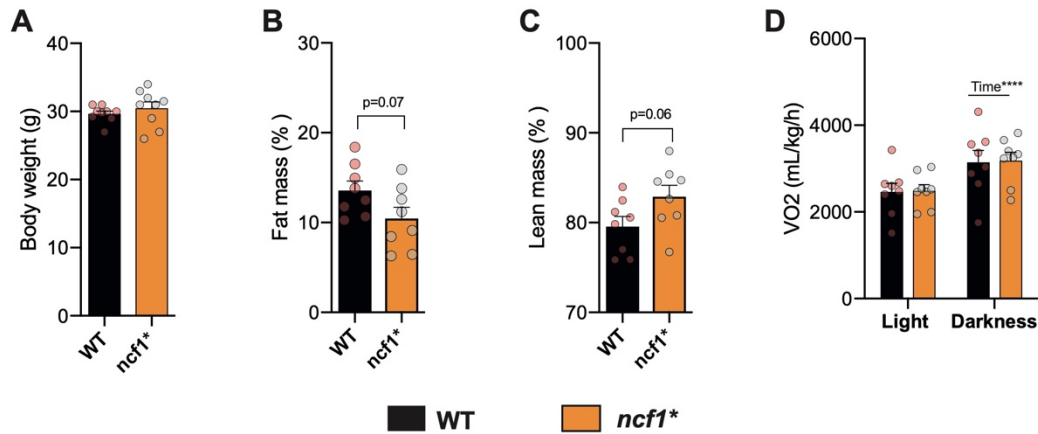

**Supplementary Figure 4.** Body weight and composition of *ncf1*\* mice. A) Similar body weight despite tendency to B) lower body fat, C) higher lean mass and D) equal oxygen consumption in *ncf1*\* compared to WT mice. Unpaired t-test (F) and two-way ANOVA were performed to test for effects of exercise (Exer) genotype (Geno), and interaction (Int), followed by Tukey's *post hoc* test to compare groups. \*\*\*\* denotes  $p < 0.0001$  respectively for main effects. Individual values and mean  $\pm$  SEM are shown.

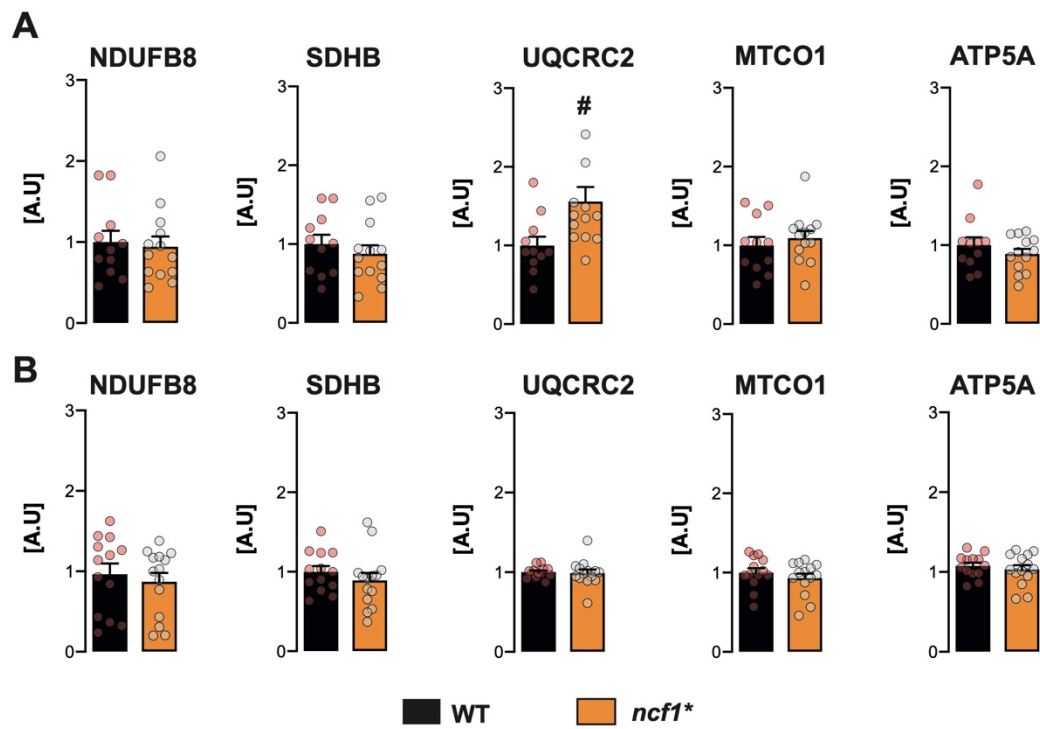

**Supplementary Figure 5.** Similar content of mitochondrial oxidative phosphorylation complex proteins in *ncf1\** compared to WT muscles. Quantification graphs of total protein showed figure 3E-F. A) quadriceps (n=12-13) and B) soleus muscle (n=13-14). A t-test was performed for statistical analysis. Individual values and mean  $\pm$ SEM are shown.

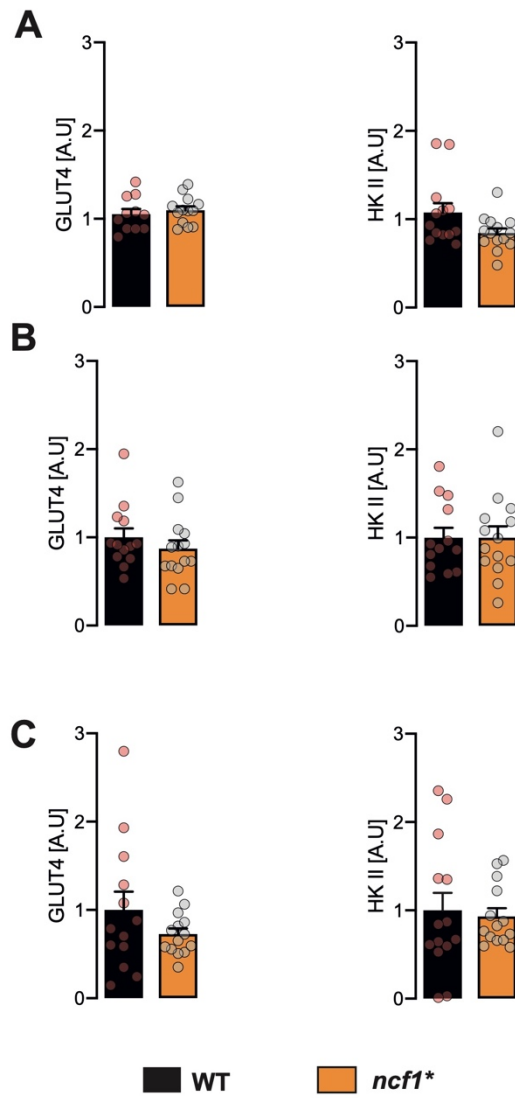

**Supplementary Figure 6.** Similar abundance of endogenous glucose handling-related proteins in *ncf1\** and WT muscles. Quantification graphs of total protein showed in figure 3B-D. A) quadriceps B) soleus, and C) tibialis anterior (TA) muscles. A t-test was performed for statistical analysis. Individual values and mean  $\pm$ SEM are shown.
